# Supplementary material
Source: publisher figshare collection journal article supplement (https://acs.figshare.com/ndownloader/files/21114816)
Supplement: Supplementary file 1 [file 21114816]

## Supplementary Information

# Human Plasma Protein Corona of A $\beta$ Amyloid and Its Impact on IAPP Cross-Seeding

*Aparna Nandakumar,<sup>1</sup> Yanting Xing,<sup>2</sup> Ritchlynn R. Aranha,<sup>3</sup> Ava Faridi,<sup>1</sup> Aleksandr Kakinen,<sup>1</sup>  
Ibrahim Javed,<sup>1</sup> Kairi Koppel,<sup>1</sup> Emily H. Pilkington,<sup>1</sup> Anthony Wayne Purcell,<sup>3</sup> Thomas P.  
Davis,<sup>1,4</sup> Pouya Faridi,<sup>3</sup> Feng Ding,<sup>3</sup> and Pu Chun Ke<sup>1\*</sup>*

<sup>1</sup>ARC Centre of Excellence in Convergent Bio-Nano Science and Technology,  
Monash Institute of Pharmaceutical Sciences, Monash University, 381 Royal Parade,  
Parkville, VIC 3052, Australia

<sup>2</sup>Department of Physics and Astronomy, Clemson University, Clemson, SC 29634, United States

<sup>3</sup>Infection and Immunity Program & Department of Biochemistry and Molecular Biology,  
Biomedicine Discovery Institute, Monash University, Clayton, Victoria 3800, Australia

<sup>4</sup>Australian Institute for Bioengineering and Nanotechnology,  
The University of Queensland, Brisbane Qld 4072, Australia

E-mail: pu-chun.ke@monash.edu

**Table S1. Unique proteins identified in the A $\beta$  fibrillar coronae.**

| <b>Uniport accession</b> | <b>A<math>\beta</math><sub>1-42</sub> unique</b>               | <b>Protein</b> |
|--------------------------|----------------------------------------------------------------|----------------|
| Q02413                   | Desmoglein-1                                                   | DSG1           |
| Q8NHM4                   | Putative trypsin 6                                             | TRY6           |
| P01275                   | Glucagon                                                       | GLUC           |
| P14923                   | Epiplakin                                                      | PLAK           |
| A0A075B6S5               | Immunoglobulin kappa variable 1-27                             | KV127          |
| P11226                   | Mannose-binding protein C                                      | MBL2           |
| P08709                   | Coagulation factor VII                                         | FA7            |
| O60346                   | PH domain leucine-rich repeat-containing protein phosphatase 1 | PHLP1          |
| Q16820                   | Meprin A subunit beta                                          | MEP1B          |

| <b>Uniport accession</b> | <b>A<math>\beta</math><sub>1-40</sub> unique</b>             | <b>Protein</b> |
|--------------------------|--------------------------------------------------------------|----------------|
| P27918                   | Properdin                                                    | PROP           |
| P01764                   | Immunoglobulin heavy variable 3                              | HV323          |
| P0DJI8                   | Serum amyloid A-1                                            | SAA1           |
| P29475                   | Nitric oxide synthase brain                                  | NOS1           |
| P10645                   | Chromogranin                                                 | CMGA           |
| Q7Z745                   | Maestro heat-like repeat-containing protein family member 2B | MRO2B          |
| P81605                   | Dermcidin                                                    | DCD            |
| P29120                   | Neuroendocrine convertase                                    | NEC1           |
| Q13106                   | Zinc finger protein 154                                      | ZN154          |

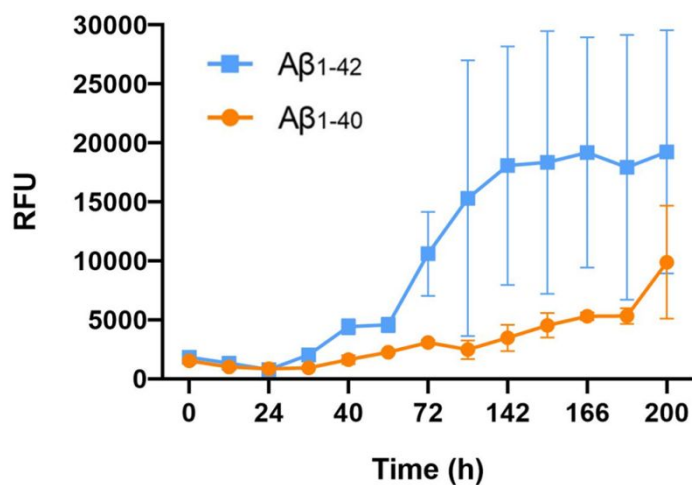

| Sample name        | Lag time (h) | k (h <sup>-1</sup> ) | t <sub>1/2</sub> (h) |
|--------------------|--------------|----------------------|----------------------|
| Aβ <sub>1-42</sub> | 47±5         | 0.08±0.01            | 70.9                 |
| Aβ <sub>1-40</sub> | 72±40        | 0.02±0.01            | 178.2                |

**Figure S1.** ThT fibrillization kinetics of Aβ<sub>1-42</sub> and Aβ<sub>1-40</sub> (50 μM). Formation of amyloid fibrils was detected by the increase in the relative fluorescence unit (RFU) upon binding of the ThT dye to the hydrophobic grooves of the amyloids. Aβ<sub>1-42</sub> has a significantly lower fibrillization half time and a 4-fold faster fibril growth rate than Aβ<sub>1-40</sub>. k: fibrillization rate constant. t<sub>1/2</sub>: reaction half-time.

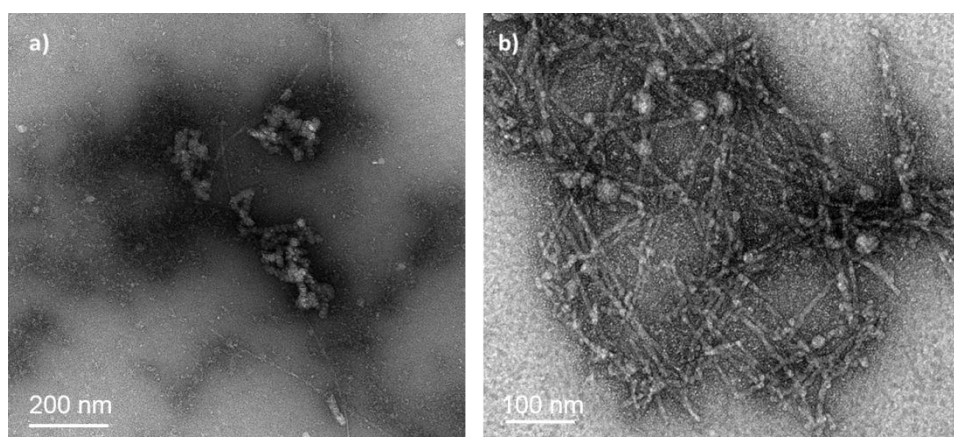

**Figure S2.** Distinct patterns observed on fibrillar-corona isolates for a) A $\beta_{1-42}$  and b) A $\beta_{1-40}$  fibrils.

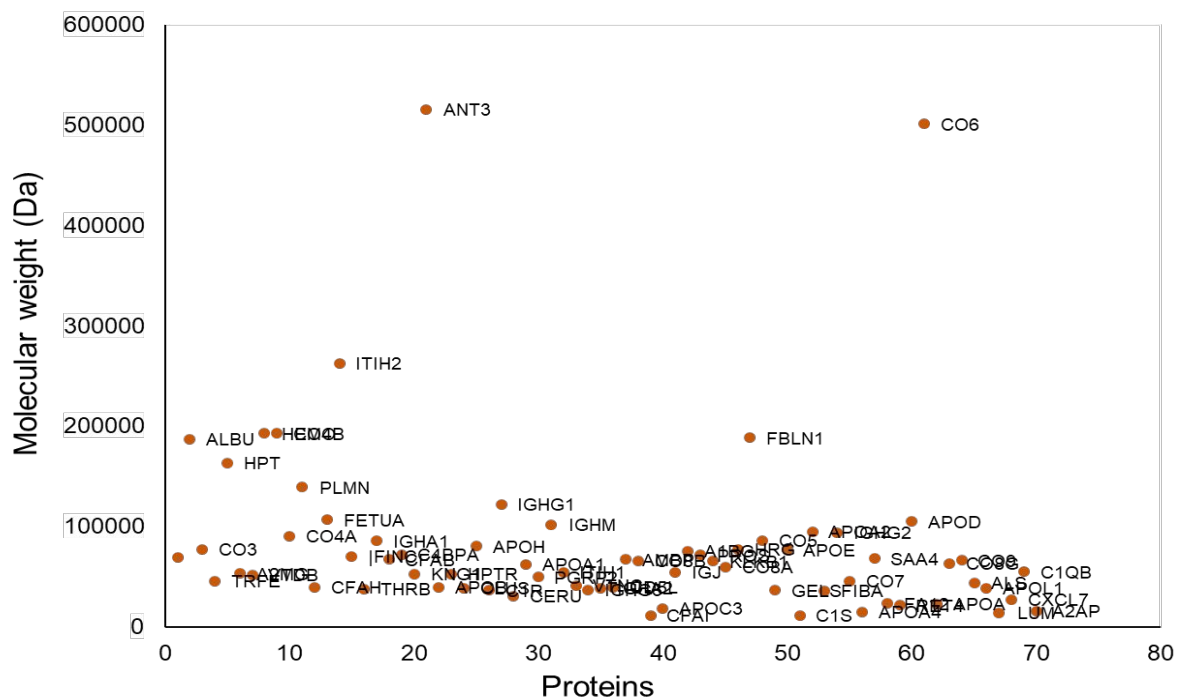

**Figure S3.** Most abundant coronal proteins as a function of molecular weight (in Da), with the point size indicating the ratio of coronal protein abundance of  $A\beta_{1-40}/A\beta_{1-42}$ . Most of the coronal proteins tend to have an average mass below 100 kDa.

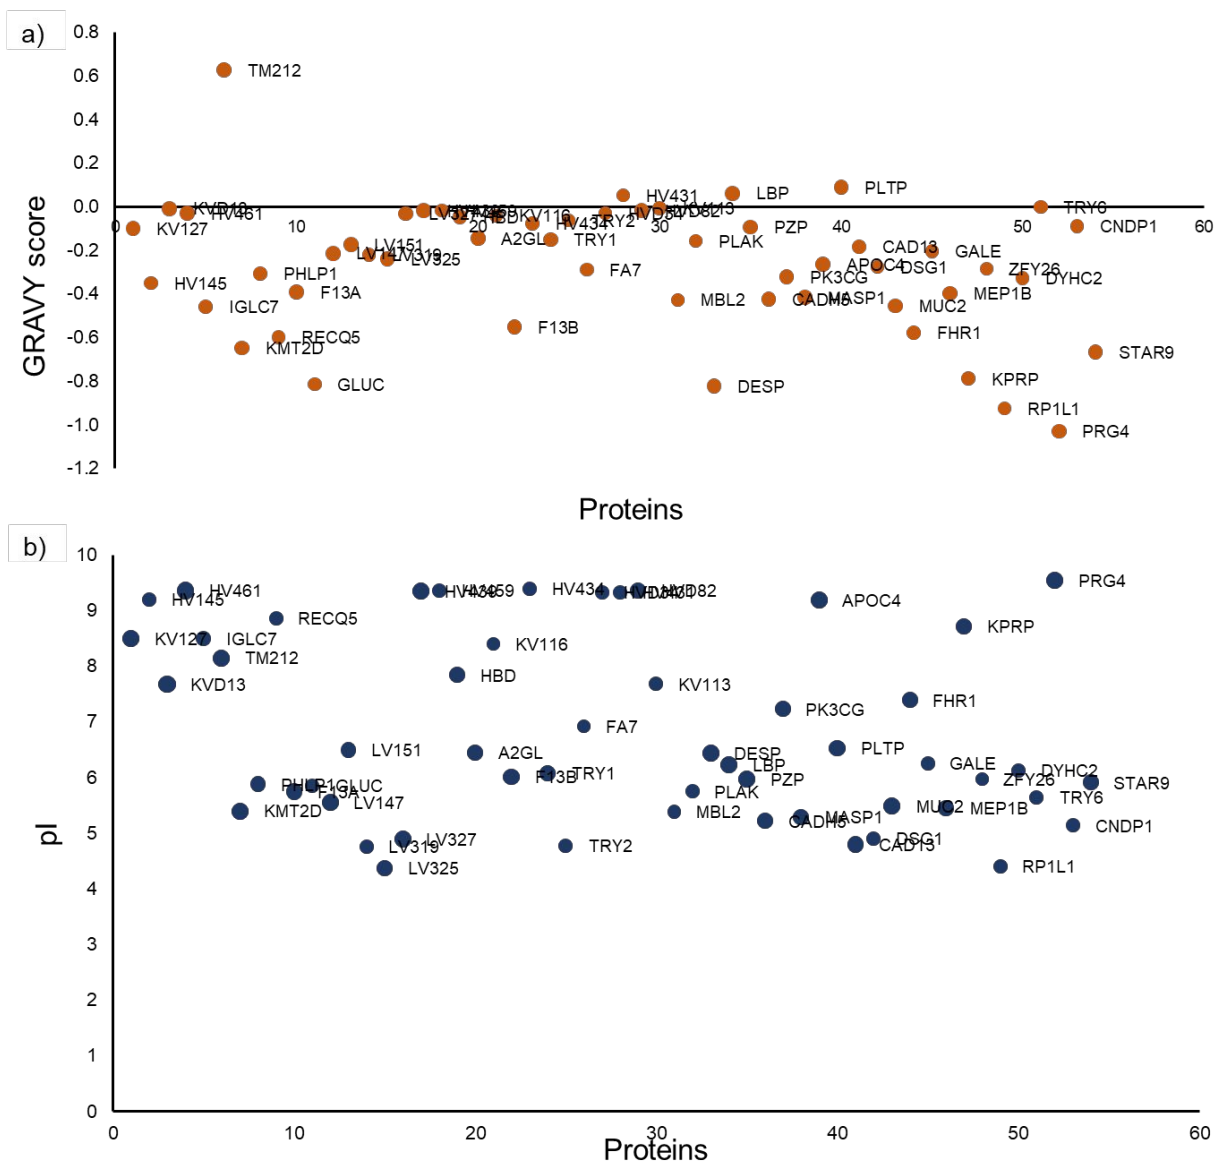

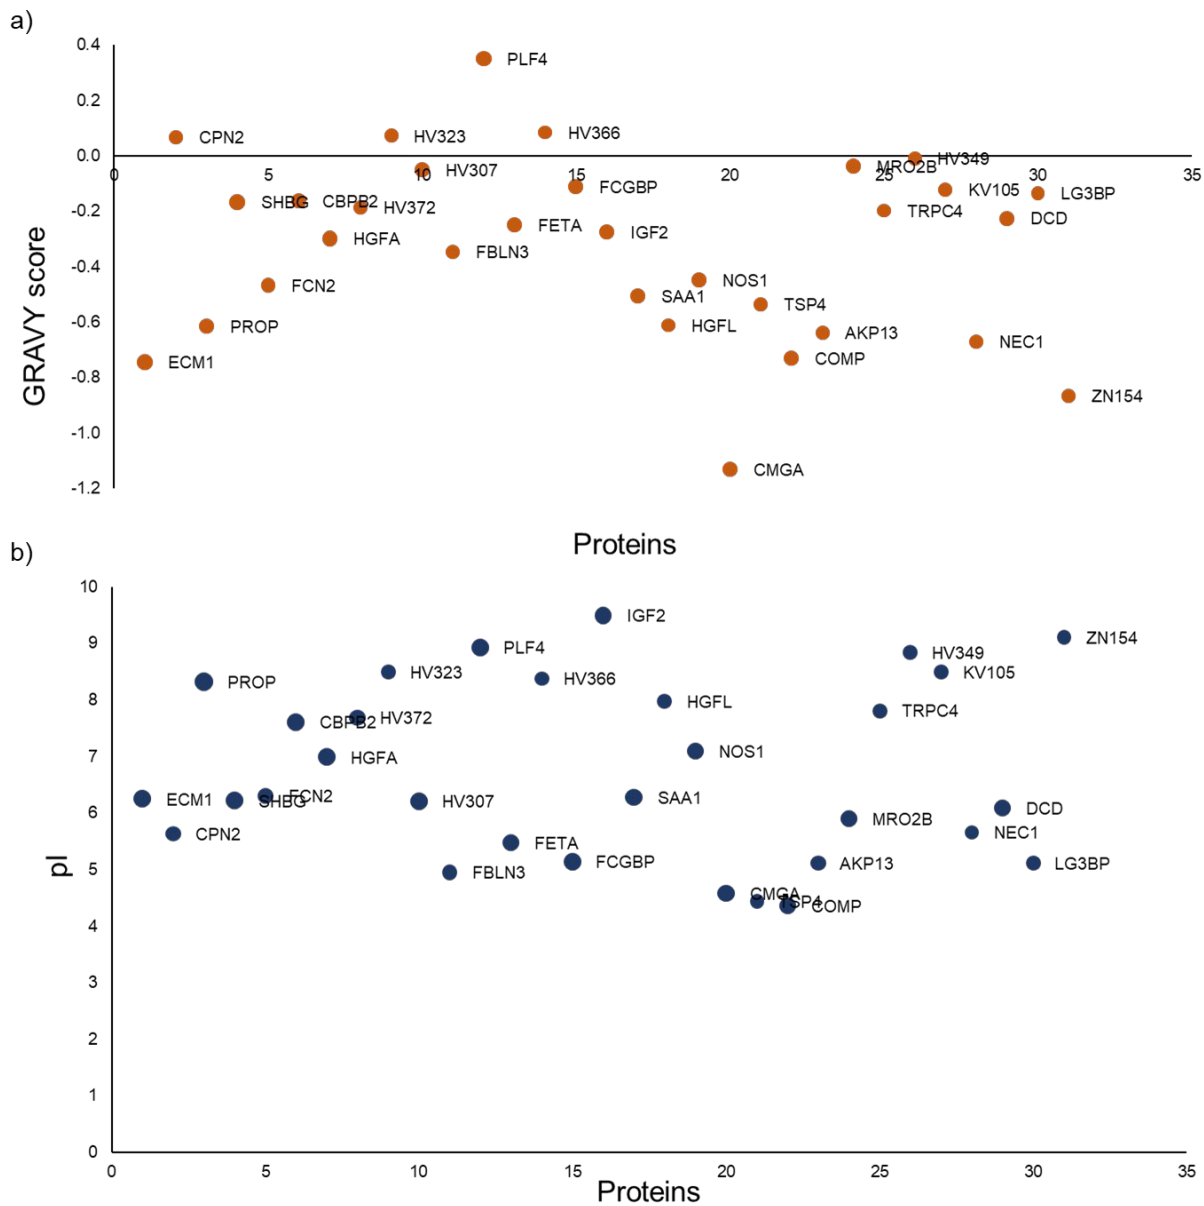

**Figure S5.** Physicochemical properties of the unique proteins identified in the A $\beta_{1-40}$  corona, showing a) GRAVY Score and b) pI values of the coronal proteins.

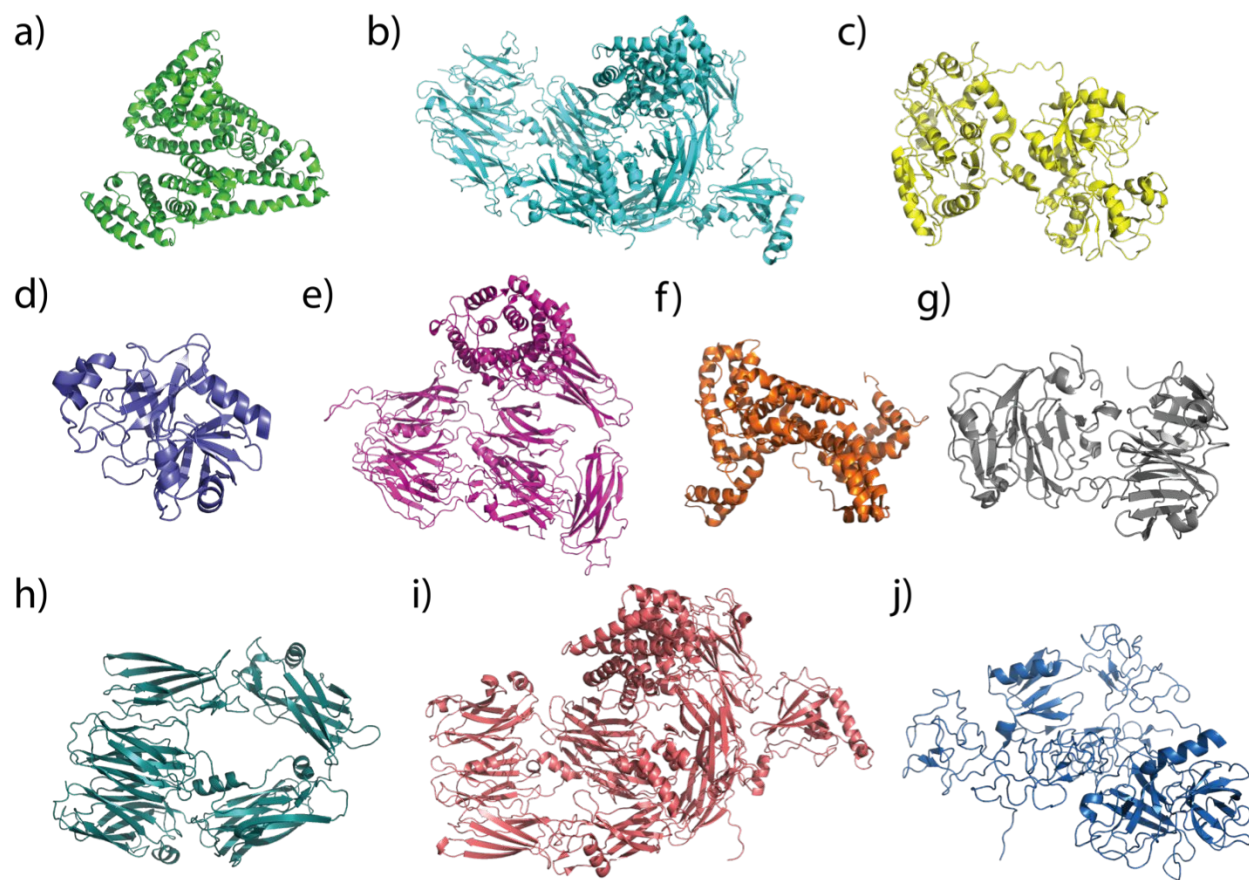

**Figure S6. Structures of top-10 abundant coronal proteins** of a) serum albumin, b) complement C3, c) serotransferrin, d) haptoglobin, e) alpha-2-macroglobulin, f) vitamin D-binding protein, g) hemopexin, h) complement C4-B, i) complement C4-A, and j) plasminogen, shown in cartoon representations.
